# Supplementary material for: Reset First Resistive Switching in Ni1−xO Thin Films as Charge Transfer Insulator Deposited by Reactive RF Magnetron Sputtering
Source: MDPI journal article supplement (doi:10.3390/nano12132231), 2022-06-29
Supplement: s1 [file s1]

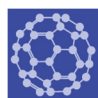

Supplementary materials

# Reset first resistive switching in $\text{Ni}_{1-x}\text{O}$ thin films as charge transfer insulator deposited by reactive RF magnetron sputtering

Daewoo Kim<sup>1</sup>, Taeho Kim<sup>1,2</sup>, Jaeyeon Kim<sup>1</sup> and Hyunchul Sohn<sup>1,\*</sup><sup>1</sup> Department of Materials Science and Engineering, Yonsei University, Seoul, 03722, Korea;

daewoo.kim@yonsei.ac.kr (D.W.K.); kkthh22@yonsei.ac.kr (T.H.K.); jaeyeonkim@yonsei.ac.kr (J.Y.K.)

<sup>2</sup> Lam research, Icheon-si, 17336, Korea

\* Correspondence: hyunchul.sohn@yonsei.ac.kr (H.C.S.); Tel.: +82-2-2123-5850

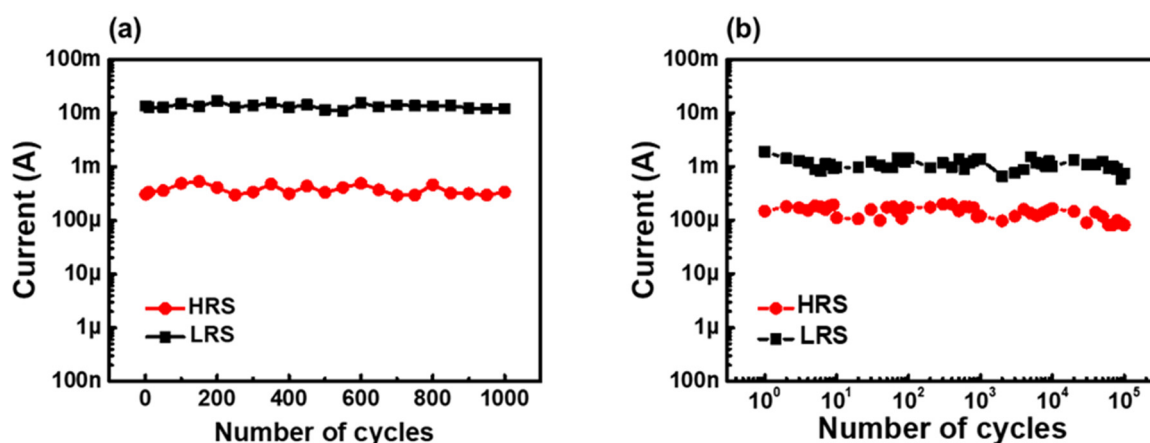

**Figure S1.** Endurance characteristics of  $\text{Ni}_{1-x}\text{O}$  bipolar RS device with (a) DC cycles measured with  $V_{\text{read}}$  of  $\pm 0.25$  V, and (b) AC pulses cycles measured with a set pulse ( $V_{\text{set}}$ ) of  $-0.95$  V with 180 ns, a reset pulse ( $V_{\text{reset}}$ ) of 1.2 V with 180 ns and  $V_{\text{read}}$  of 0.3 V.
